# Supplementary material for: Treatment for overactive bladder: A meta-analysis of tibial versus parasacral neuromodulation
Source: PubMed Central journal article supplement — Medicine (Baltimore). 2022 Oct 14;101(41):e31165. doi: 10.1097/MD.0000000000031165 (PMC9575790; doi:10.1097/md.0000000000031165), 2022-10-14
Supplement: medi-101-e31165-s001.pdf [file medi-101-e31165-s001.pdf]

**Supplementary Fig 1** Risk of bias of included studies.

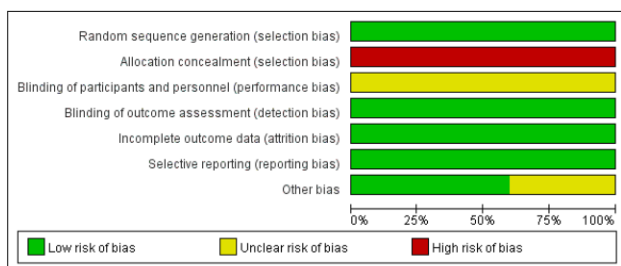

|                                                           | Barroso (2013) | Devil (2014) | Jacomo (2019) | Mullmann (2020) | Padilha (2021) |
|-----------------------------------------------------------|----------------|--------------|---------------|-----------------|----------------|
| Random sequence generation (selection bias)               | +              | +            | +             | +               | +              |
| Allocation concealment (selection bias)                   | -              | -            | -             | -               | -              |
| Blinding of participants and personnel (performance bias) | ?              | ?            | ?             | ?               | ?              |
| Blinding of outcome assessment (detection bias)           | +              | +            | +             | +               | +              |
| Incomplete outcome data (attrition bias)                  | +              | +            | +             | +               | +              |
| Selective reporting (reporting bias)                      | +              | +            | +             | +               | +              |
| Other bias                                                | +              | +            | ?             | ?               | ?              |
