# Supplementary figures and images for: Treatment for overactive bladder: A meta-analysis of tibial versus parasacral neuromodulation
Source: PubMed Central journal article supplement — Medicine (Baltimore). 2022 Oct 14;101(41):e31165. doi: 10.1097/MD.0000000000031165 (PMC9575790; doi:10.1097/md.0000000000031165), 2022-10-14

**Supplementary Fig 2** Publication bias of primary outcomes.

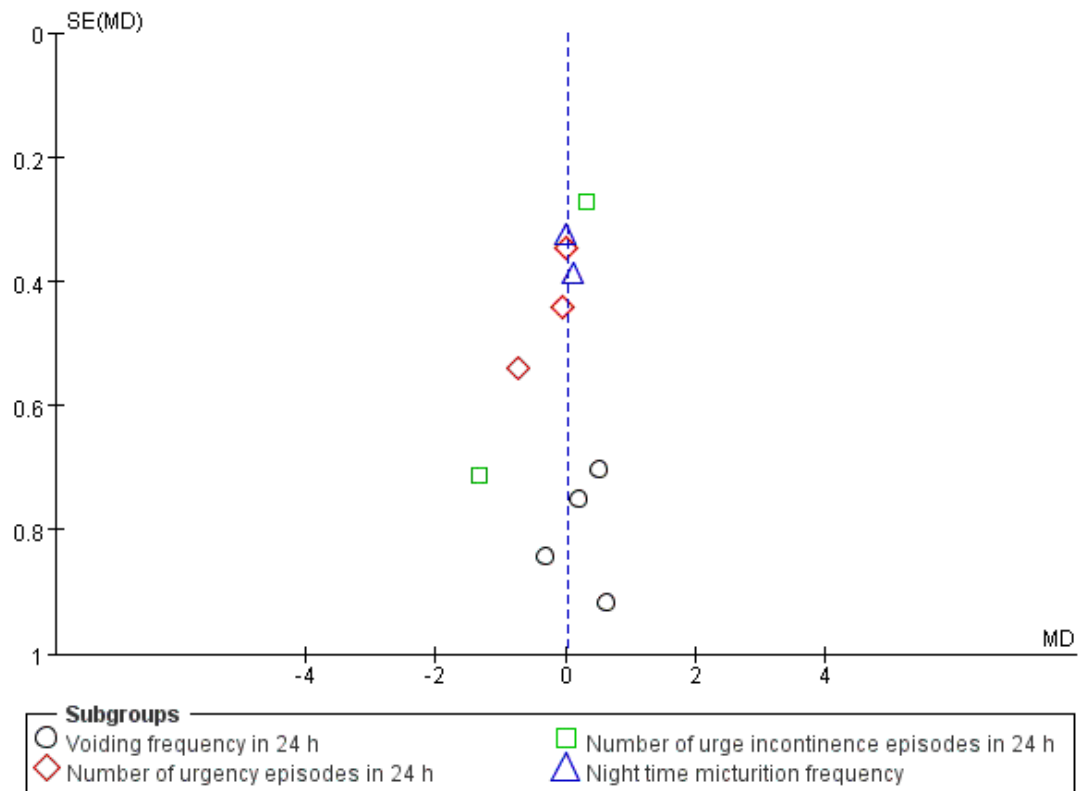

Supplement: medi-101-e31165-s002.pdf [file medi-101-e31165-s002.pdf]
